# Supplementary material for: Making Decisions with Data
Source: Oxford University Press journal article supplement (doi:10.1525/abt.2021.83.4.229), 2021-04-01
Supplement: abt8304_04_i2_cooper_supplemental_material_appendix_s1.docx [file abt8304_04_i2_cooper_supplemental_material_appendix_s1.docx]

Appendix S1

| **Comparing Sun Leaves and Shade Leaves** | | | | | | |
| --- | --- | --- | --- | --- | --- | --- |
| **Student** |  | **Mass of Sun Leaves (g) (South Side)** | **Surface Area of Sun Leaves (cm2)** | **Student** | **Mass of Shade Leaves (g) (North Side)** | **Surface Area of Shade Leaves (cm2)** | |
| **1** | 1 | 0.69 | 97.90 | 1 | 0.76 | 107.83 | |
|  | 2 | 0.48 | 68.10 | 2 | 0.54 | 76.62 | |
| **2** | 1 | 0.75 | 106.41 | 1 | 0.52 | 73.78 | |
|  | 2 | 0.70 | 99.32 | 2 | 0.57 | 80.87 | |
| **3** | 1 | 0.74 | 104.99 | 1 | 0.60 | 85.13 | |
|  | 2 | 0.48 | 68.10 | 2 | 0.76 | 107.83 | |
| **4** | 1 | 0.33 | 46.82 | 1 | 0.63 | 89.38 | |
|  | 2 | 0.61 | 86.55 | 2 | 0.87 | 123.44 | |
| **5** | 1 | 0.34 | 48.24 | 1 | 0.67 | 95.06 | |
|  | 2 | 0.40 | 56.75 | 2 | 0.66 | 93.64 | |
| **6** | 1 | 0.45 | 63.85 | 1 | 0.66 | 93.64 | |
|  | 2 | 0.40 | 56.75 | 2 | 0.60 | 85.13 | |
| **7** | 1 | 0.60 | 85.13 | 1 | 0.88 | 124.85 | |
|  | 2 | 0.43 | 61.01 | 2 | 0.51 | 72.36 | |
| **8** | 1 | 0.33 | 46.82 | 1 | 0.73 | 103.57 | |
|  | 2 | 0.47 | 66.68 | 2 | 0.68 | 96.48 | |
| **9** | 1 | 0.56 | 79.45 | 1 | 0.67 | 95.06 | |
|  | 2 | 0.49 | 69.52 | 2 | 0.60 | 85.13 | |
| **10** | 1 | 0.54 | 76.62 | 1 | 0.70 | 99.32 | |
|  | 2 | 0.50 | 70.94 | 2 | 0.82 | 116.34 | |
| **11** | 1 | 0.50 | 70.94 | 1 | 0.71 | 100.73 | |
|  | 2 | 0.50 | 70.94 | 2 | 0.91 | 129.11 | |
| **12** | 1 | 0.53 | 75.20 | 1 | 0.61 | 86.55 | |
|  | 2 | 0.52 | 73.78 | 2 | 0.78 | 110.67 | |
| **13** | 1 | 0.54 | 76.62 | 1 | 0.49 | 69.52 | |
|  | 2 | 0.37 | 52.50 | 2 | 0.66 | 93.64 | |
| **14** | 1 | 0.55 | 78.03 | 1 | 0.68 | 96.48 | |
|  | 2 | 0.42 | 59.59 | 2 | 0.66 | 93.64 | |
| **15** | 1 | 0.57 | 80.87 | 1 | 0.92 | 130.53 | |
|  | 2 | 0.37 | 52.50 | 2 | 0.70 | 99.32 | |
| **16** | 1 | 0.65 | 92.22 | 1 | 0.59 | 83.71 | |
|  | 2 | 0.47 | 66.68 | 2 | 0.51 | 72.36 | |
| **17** | 1 | 0.65 | 92.22 | 1 | 0.73 | 103.57 | |
|  | 2 | 0.65 | 92.22 | 2 | 0.80 | 113.50 | |
| **18** | 1 | 0.35 | 49.66 | 1 | 0.84 | 119.18 | |
|  | 2 | 0.76 | 107.83 | 2 | 0.70 | 99.32 | |
| **19** | 1 | 0.49 | 69.52 | 1 | 0.55 | 78.03 | |
|  | 2 | 0.60 | 85.13 | 2 | 0.67 | 95.06 | |
| **20** | 1 | 0.58 | 82.29 | 1 | 0.52 | 73.78 | |
|  | 2 | 0.42 | 59.59 | 2 | 0.82 | 116.34 | |
